# Supplementary material
Source: PubMed Central journal article supplement (PMC5474312)
Supplement: NIHMS864809-supplement-supplement_1.pdf [file NIHMS864809-supplement-supplement_1.pdf]

**Supplemental Table 1 Patient Disposition and Study Drug Exposure**

|                                                                         | Linsitinib + Erlotinib (N = 43)<br>N (%) |                | Placebo + Erlotinib (N = 44)<br>N (%) |                |
|-------------------------------------------------------------------------|------------------------------------------|----------------|---------------------------------------|----------------|
|                                                                         | Linsitinib                               | Erlotinib      | Placebo                               | Erlotinib      |
| <b>Drug exposure (d)</b>                                                |                                          |                |                                       |                |
| Mean (SD)                                                               | 199.3 (147.6)                            | 225.2 (156.8)  | 287.5 (121.5)                         | 311.9 (127.8)  |
| Median (range)                                                          | 197.0 (15-548)                           | 228.0 (14-576) | 279.0 (43-548)                        | 305.0 (43-551) |
| <b>Dose intensity (mg/dosing days)</b>                                  |                                          |                |                                       |                |
| Mean (SD)                                                               | 273.4 (36.2)                             | 135.5 (21.4)   | 287.7 (35.2)                          | 140.0 (21.2)   |
| Median (range)                                                          | 298.0 (203-300)                          | 150.0 (86-150) | 299.6 (154-304)                       | 150.0 (67-150) |
| <b>Dose intensity (mg/days on study)</b>                                |                                          |                |                                       |                |
| Mean (SD)                                                               | 243.7 (69.7)                             | 129.6 (24.4)   | 282.3 (39.0)                          | 137.6 (21.8)   |
| Median (range)                                                          | 266.2 (8-300)                            | 145.3 (73-150) | 299.2 (146-300)                       | 149.3 (64-150) |
| <b>Duration of exposure, d</b>                                          |                                          |                |                                       |                |
| ≤7 to <21                                                               | 2 (4.7)                                  | 2 (4.7)        | 0 (0)                                 | 0 (0)          |
| ≥21 to <42                                                              | 4 (9.3)                                  | 3 (7.0)        | 0 (0)                                 | 0 (0)          |
| ≥42 to <63                                                              | 6 (14.0)                                 | 6 (14.0)       | 1 (2.3)                               | 1 (2.3)        |
| ≥63 to <84                                                              | 2 (4.7)                                  | 1 (2.3)        | 1 (2.3)                               | 1 (2.3)        |
| ≥84 to <105                                                             | 1 (2.3)                                  | 1 (2.3)        | 0 (0)                                 | 0 (0)          |
| ≥105 to <126                                                            | 0 (0)                                    | 0 (0)          | 2 (4.5)                               | 2 (4.5)        |
| ≥126 to <147                                                            | 0 (0)                                    | 0 (0)          | 1 (2.3)                               | 1 (2.3)        |
| ≥147 to <168                                                            | 3 (7.0)                                  | 2 (4.7)        | 0 (0)                                 | 0 (0)          |
| ≥168                                                                    | 25 (58.1)                                | 28 (65.1)      | 39 (88.6)                             | 39 (88.6)      |
| <b>Dose modification</b>                                                |                                          |                |                                       |                |
| Interruptions                                                           | 26 (60.5)                                | 26 (60.5)      | 20 (45.5)                             | 21 (47.7)      |
| Reductions                                                              | 30 (69.8)                                | 15 (34.9)      | 26 (59.1)                             | 10 (22.7)      |
| <b>Reasons for reduction</b>                                            |                                          |                |                                       |                |
| Treatment-related AE                                                    | 11 (25.6)                                | 9 (20.9)       | 4 (9.1)                               | 8 (18.2)       |
| Nontreatment-related AE                                                 | 0 (0)                                    | 0 (0)          | 4 (9.1)                               | 0 (0)          |
| Patient noncompliance                                                   | 13 (30.2)                                | 0 (0)          | 12 (27.3)                             | 0 (0)          |
| Toxicity improved                                                       | 11 (25.6)                                | 8 (18.6)       | 4 (9.1)                               | 5 (11.4)       |
| Other                                                                   | 17 (39.5)                                | 4 (9.3)        | 14 (31.8)                             | 4 (9.1)        |
| <b>Discontinued treatment</b>                                           | 32 (74.4)                                |                | 24 (54.5)                             |                |
| <b>Primary reason for discontinued treatment, n (% of discontinued)</b> |                                          |                |                                       |                |
| Disease progression                                                     | 24 (75.0)                                |                | 22 (91.7)                             |                |
| AE                                                                      | 5 (15.6)                                 |                | 0 (0)                                 |                |
| Withdrew consent                                                        | 2 (6.3)                                  |                | 2 (8.3)                               |                |
| Medical or ethical                                                      | 1 (3.1)                                  |                | 0 (0)                                 |                |

Abbreviations: AE = Adverse event; SD = standard deviation.

# Erlotinib Plus Linsitinib in Patients With NSCLC

**Supplemental Table 2** Subgroup Analysis of Progression-Free Survival

| Subgroup                      | Linsitinib + Erlotinib (N = 44) |              |             | Placebo + Erlotinib (N = 44) |              |             | HR (95% CI)      |
|-------------------------------|---------------------------------|--------------|-------------|------------------------------|--------------|-------------|------------------|
|                               | N                               | Events N (%) | Median, mos | N                            | Events N (%) | Median, mos |                  |
| EGFR mutation status          |                                 |              |             |                              |              |             |                  |
| Exon 19 deletion              | 26                              | 15 (57.7)    | 8.4         | 25                           | 11 (44.0)    | 12.9        | 2.09 (0.94-4.64) |
| Exon 21 single-point mutation | 18                              | 8 (44.4)     | 9.4         | 19                           | 13 (68.4)    | 11.7        | 0.83 (0.34-2.01) |
| ECOG performance status       |                                 |              |             |                              |              |             |                  |
| 0                             | 21                              | 11 (52.4)    | 10.4        | 21                           | 11 (52.4)    | 13.2        | 1.03 (0.43-2.44) |
| 1                             | 23                              | 12 (52.2)    | 7.1         | 23                           | 13 (56.5)    | 11.7        | 1.91 (0.86-4.24) |
| Age group, years              |                                 |              |             |                              |              |             |                  |
| ≤65                           | 29                              | 15 (51.7)    | 8.2         | 32                           | 14 (43.8)    | 16.1        | 1.51 (0.72-3.19) |
| >65                           | 15                              | 8 (53.3)     | 8.4         | 12                           | 10 (83.3)    | 10.4        | 1.35 (0.49-3.73) |
| Gender                        |                                 |              |             |                              |              |             |                  |
| Male                          | 14                              | 7 (50.0)     | 10.4        | 12                           | 8 (66.7)     | 16.1        | 1.59 (0.50-5.04) |
| Female                        | 30                              | 16 (53.3)    | 8.2         | 32                           | 16 (50.0)    | 12.5        | 1.63 (0.80-3.34) |
| Race                          |                                 |              |             |                              |              |             |                  |
| Asian                         | 20                              | 12 (60.0)    | 8.2         | 16                           | 8 (50.0)     | 11.0        | 1.48 (0.59-3.69) |
| Other                         | 24                              | 11 (45.8)    | 8.5         | 28                           | 16 (57.1)    | 12.9        | 1.42 (0.66-3.09) |
| Cigarette smoking history     |                                 |              |             |                              |              |             |                  |
| Current or former smoker      | 11                              | 4 (36.4)     | 13.8        | 12                           | 10 (83.3)    | 9.7         | 0.58 (0.18-1.86) |
| Never smoked                  | 33                              | 19 (57.6)    | 8.4         | 32                           | 14 (43.8)    | 12.9        | 1.96 (0.97-3.96) |
| Histology                     |                                 |              |             |                              |              |             |                  |
| Adenocarcinoma                | 41                              | 20 (48.8)    | 8.5         | 42                           | 22 (52.4)    | 12.9        | 1.28 (0.69-2.37) |
| Other                         | 3                               | 3 (100)      | 1.5         | 2                            | 2 (100)      | 5.7         | 3.35 (0.34-33.4) |

Abbreviations: CI = Confidence interval; ECOG = Eastern Cooperative Oncology Group; EGFR = epidermal growth factor receptor; HR = hazard ratio.
